# Supplementary material for: Rational incorporation of covalent organic framework/carbon nanotube (COF/CNT) composites for electrochemical aptasensing of ultra-trace atrazine
Source: Royal Society of Chemistry journal article supplement (doi:10.1039/d1tc01506k), 2021-01-01
Supplement: d1tc01506k1.pdf [file d1tc01506k1.pdf]

## Supplementary Information

### **Rational incorporation of covalent organic framework/carbon nanotube (COF/CNT) composites for electrochemical aptasensing of ultra-trace atrazine**

Qian-Qian Zhu,<sup>a</sup> Hong-Kai Li,<sup>a</sup> Xiao-Long Sun,<sup>a</sup> Zhang-Ye Han,<sup>a</sup> Jianchao Sun,<sup>b</sup> and

Hongming He<sup>\*a</sup>

<sup>a</sup> *Tianjin Key Laboratory of Structure and Performance for Functional Molecules, College of Chemistry, Tianjin Normal University, Tianjin 300387, China*

<sup>b</sup> *School of Environment and Material Engineering, Yantai University, Yantai, Shandong 264005, China*

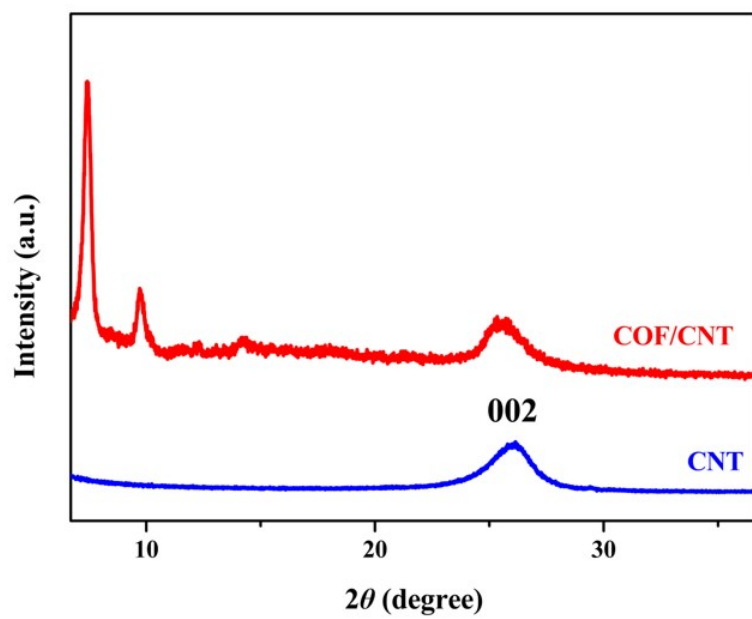

**Figure S1.** The PXRD patterns of COF/CNT and CNT.

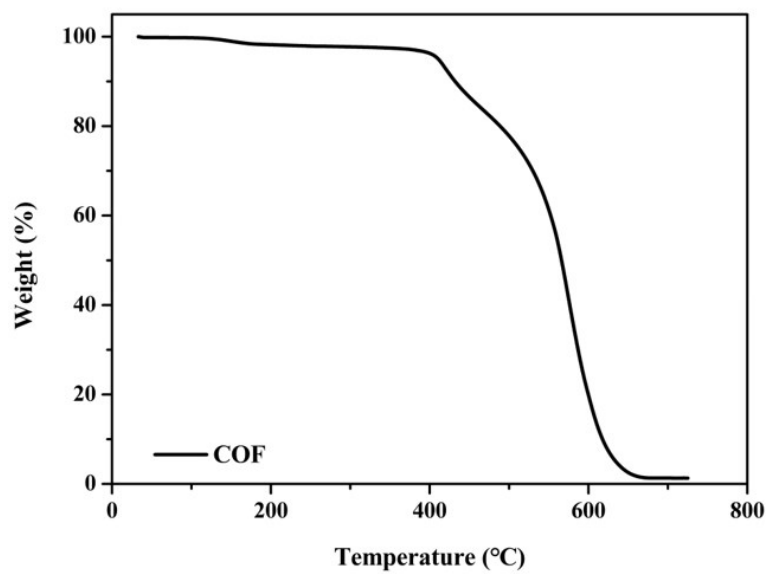

**Figure S2.** The TG curve of COF.

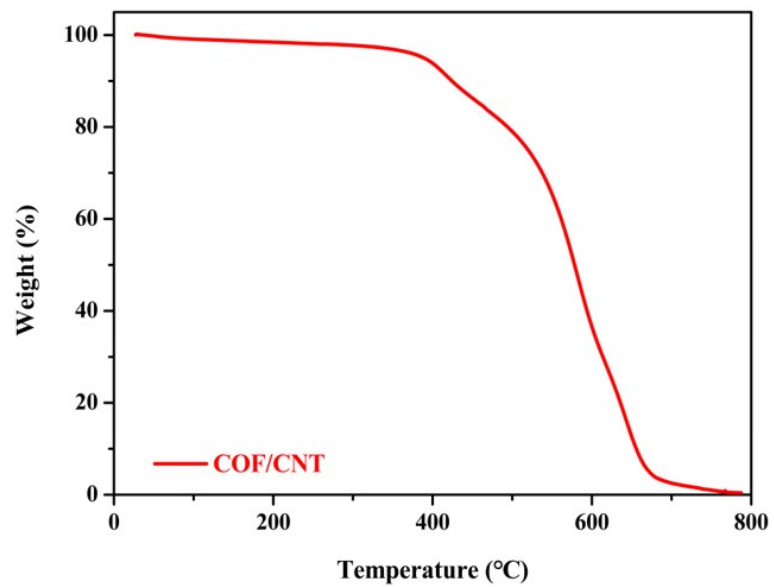

**Figure S3.** The TG curve of COF/CNT.

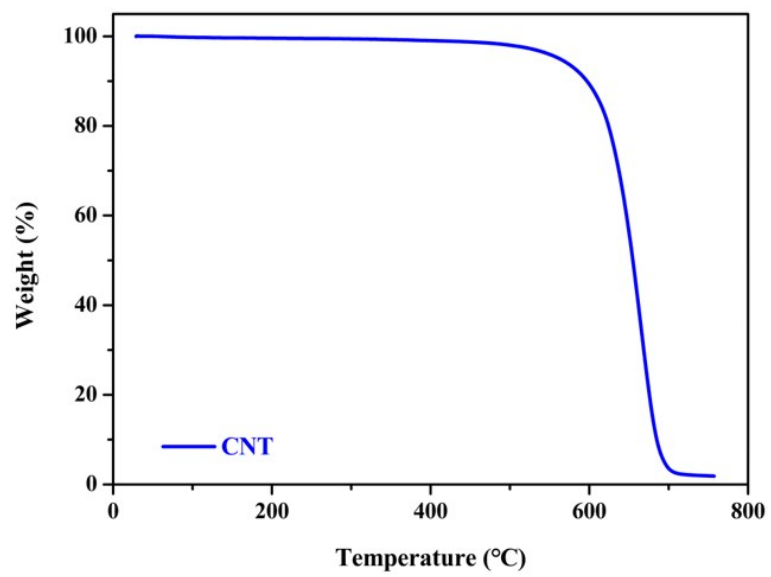

**Figure S4.** The TG curve of CNT.

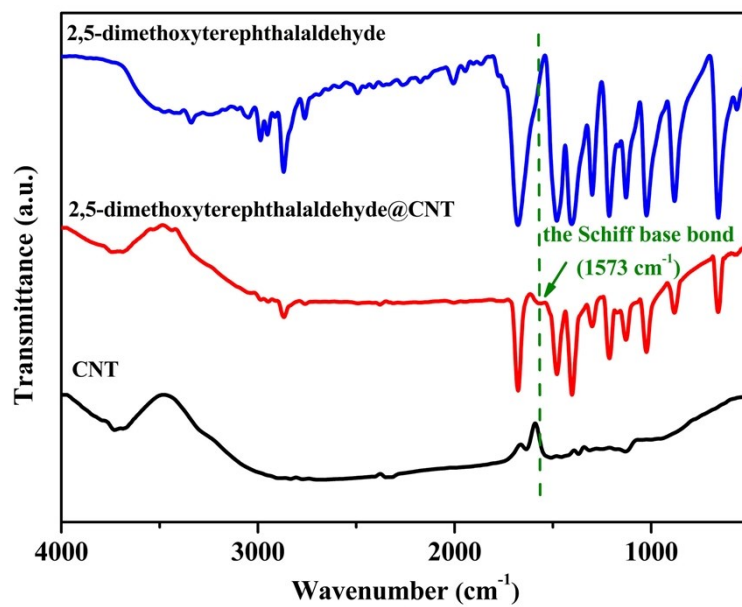

**Figure S5.** The FT-IR spectra.

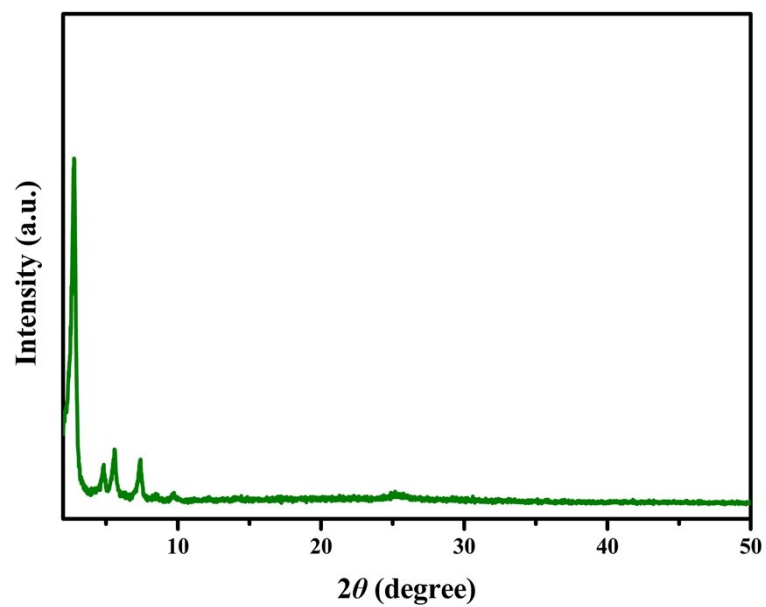

**Figure S6.** The PXRD pattern of activated sample.

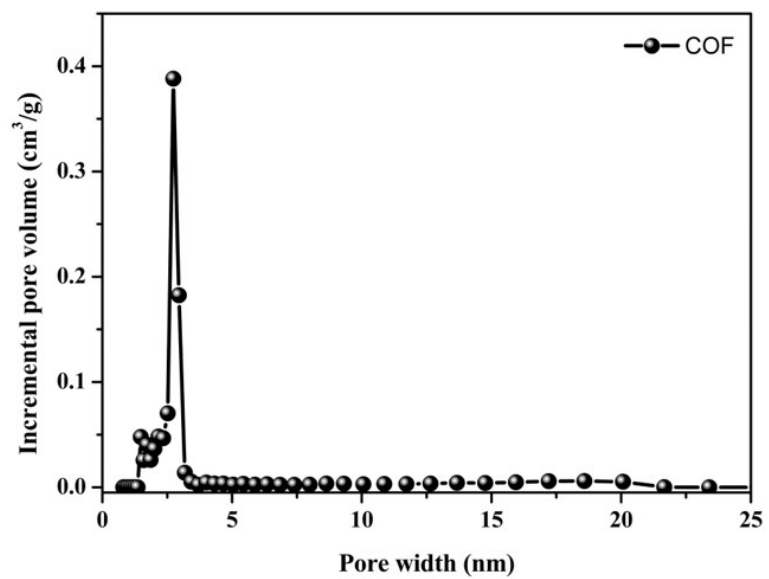

**Figure S7.** The pore size distribution of COF.



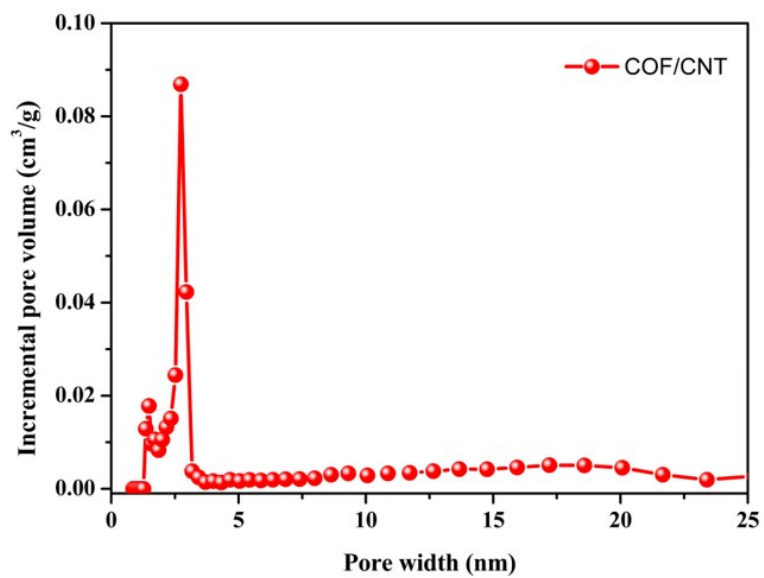

**Figure S8.** The pore size distribution of COF/CNT.

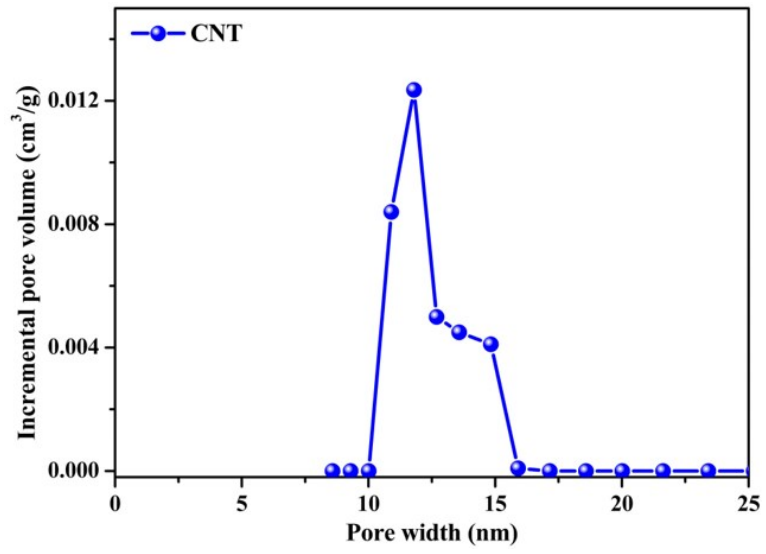

**Figure S9.** The pore size distribution of CNT.

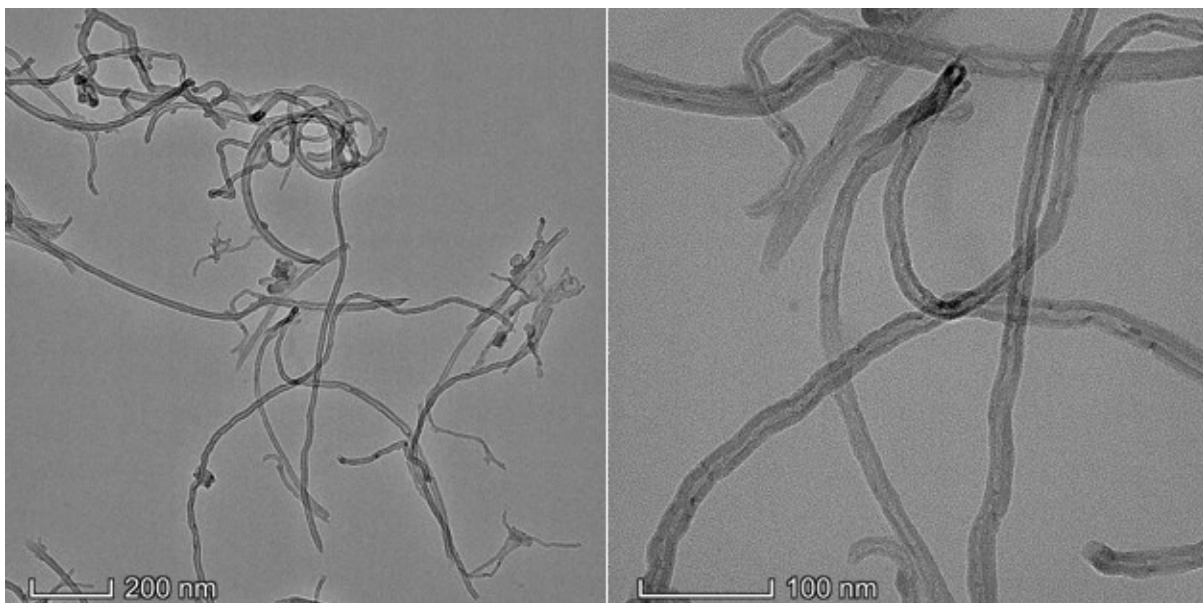

**Figure S10.** The TEM images of CNT.

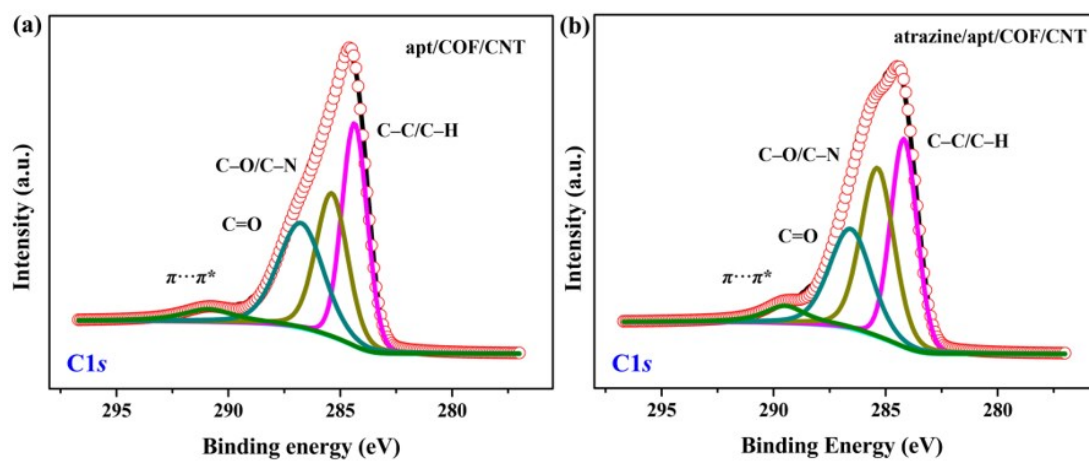

**Figure S11.** The high-resolution XPS spectra of C 1s in (a) apt/COF/CNT and (b) atrazine/apt/COF/CNT.

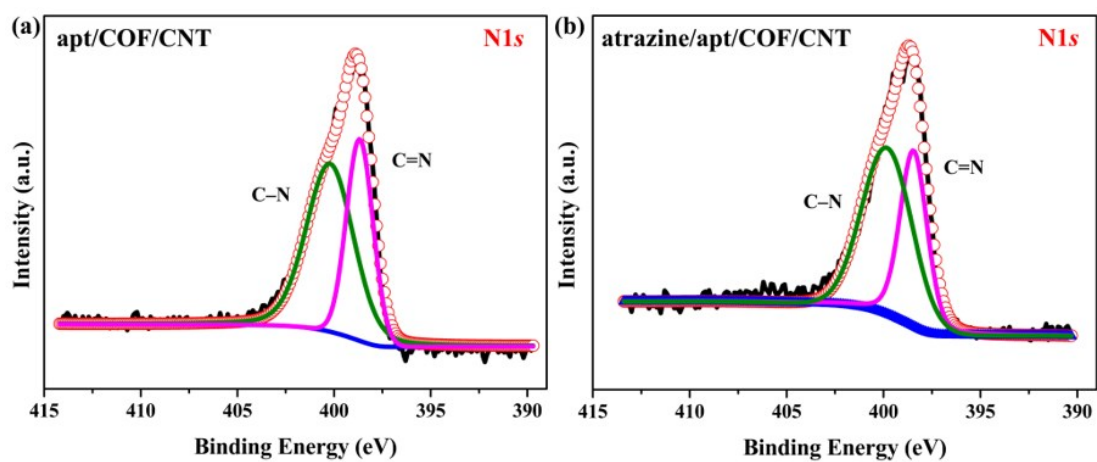

**Figure S12.** The high-resolution XPS spectra of N 1s in (a) apt/COF/CNT and (b) atrazine/apt/COF/CNT.

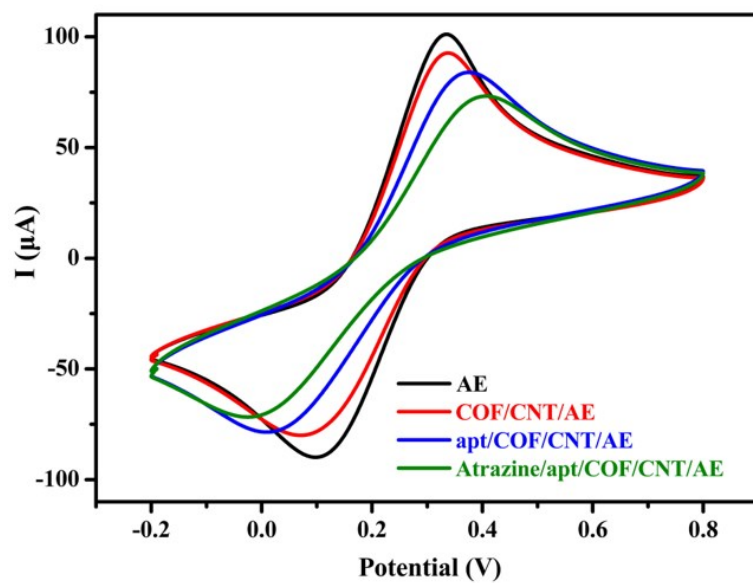

**Figure S13.** CV curves of different modified electrodes for the COF/CNT-based aptasensor.

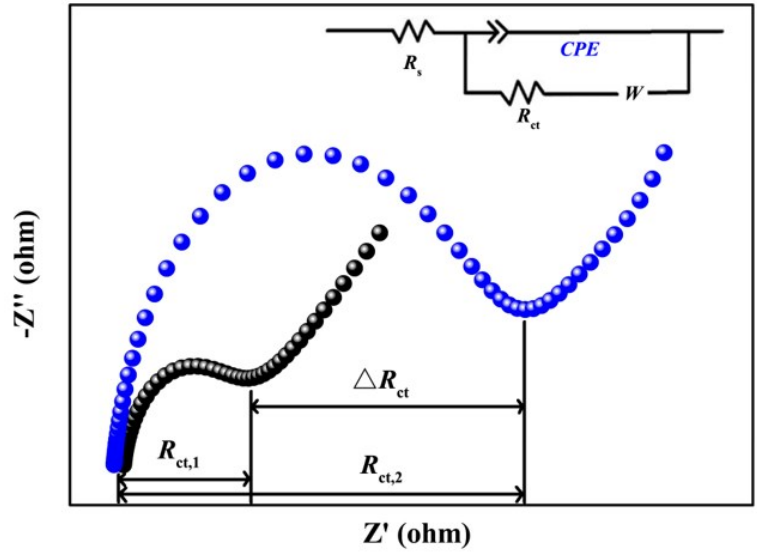

**Figure S14.** EIS Nyquist plots with the equivalent circuit.

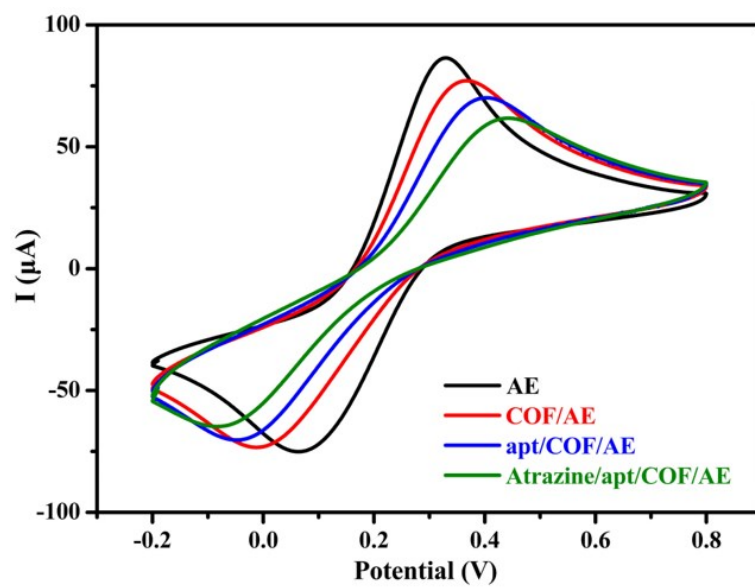

**Figure S15.** CV curves of different modified electrodes for the COF-based aptasensor.



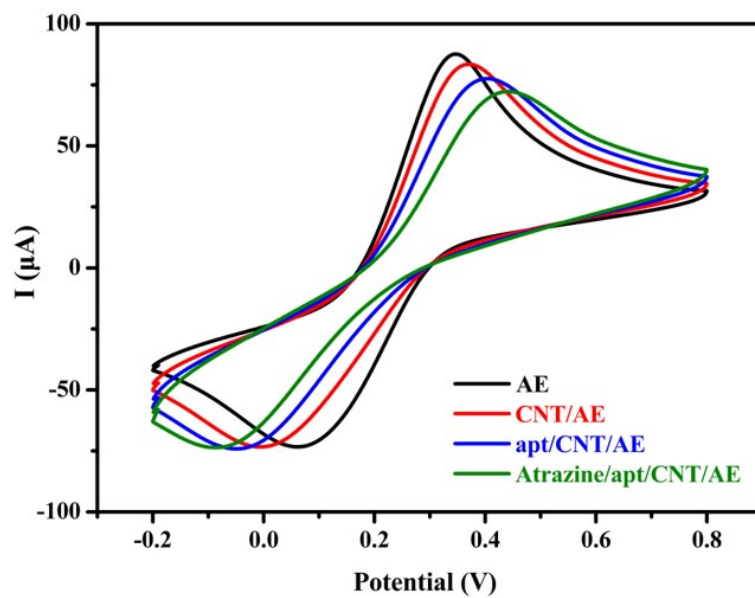

**Figure S16.** CV curves of different modified electrodes for the CNT-based aptasensor.
